# Supplementary material for: Heterostructured nanocomposite tin phthalocyanine@mesoporous ceria (SnPc@CeO2) for photoreduction of CO2 in visible light
Source: Royal Society of Chemistry journal article supplement (doi:10.1039/c5ra06449j), 2015-01-01
Supplement: c5ra06449j1.pdf [file c5ra06449j1.pdf]

## Supporting Information

### Heterostructured nanocomposite tin phthalocyanine@mesoporous ceria

### (SnPc@CeO<sub>2</sub>) for photoreduction of CO<sub>2</sub> in visible light

Pawan Kumar,<sup>a</sup> Arvind Kumar,<sup>a</sup> Chetan Joshi,<sup>a</sup> Raghuvir Singh,<sup>b</sup> Sandeep Saran,<sup>b</sup> and Suman L. Jain<sup>a\*</sup>

<sup>a</sup>Chemical Sciences Division, CSIR-Indian Institute of Petroleum, Dehradun India 248005

Email: suman@iip.res.in

<sup>b</sup>Analytical Sciences Division, CSIR-Indian Institute of Petroleum, Dehradun India 248005

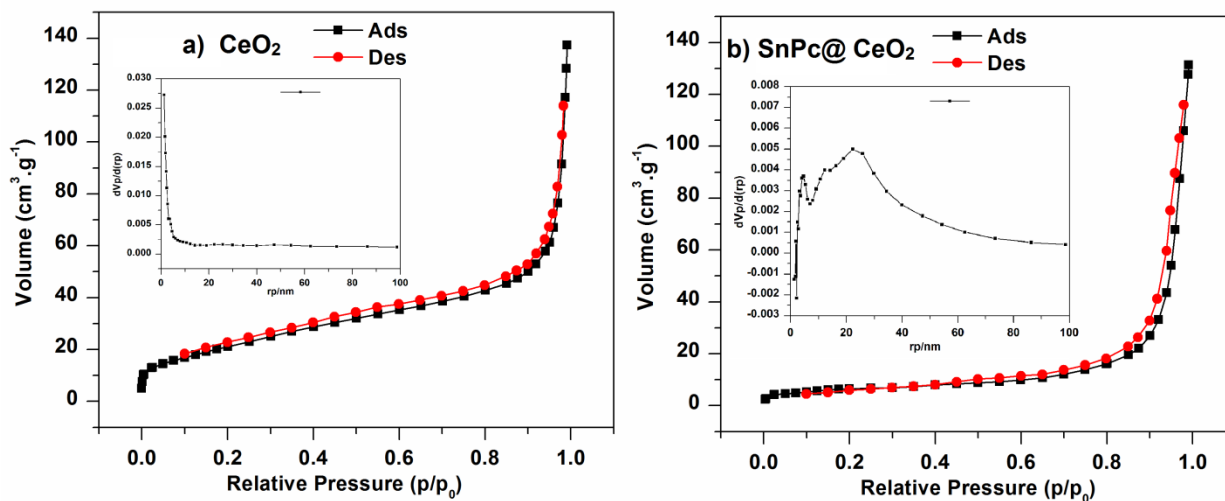

**Fig. S1** N<sub>2</sub> adsorption-desorption isotherm and pore size distribution of (a) meso-CeO<sub>2</sub> and (b)

SnPc@CeO<sub>2</sub>

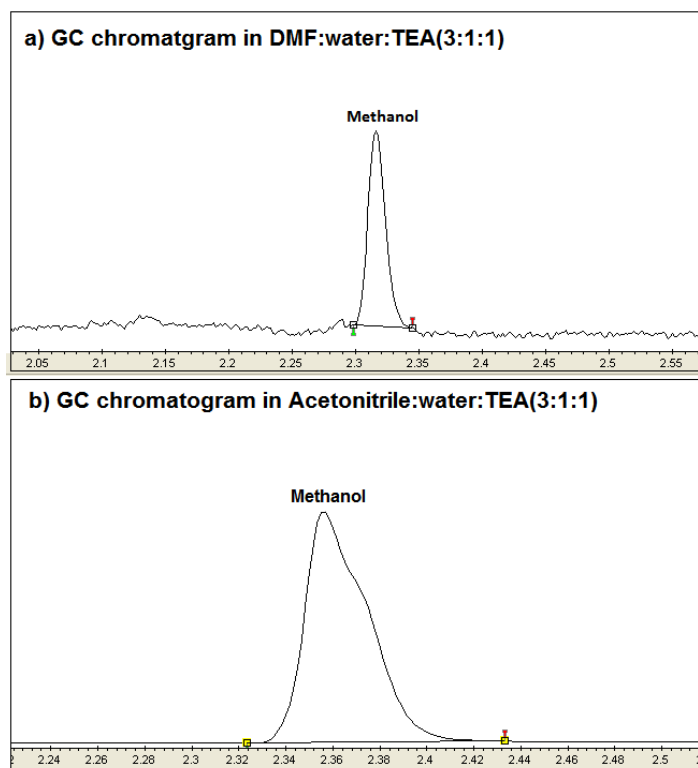

**Fig. S2** GC-FID signal of reaction product by using SnPc@CeO<sub>2</sub> after 24 hour of visible light irradiation a) in DMF b) in acetonitrile

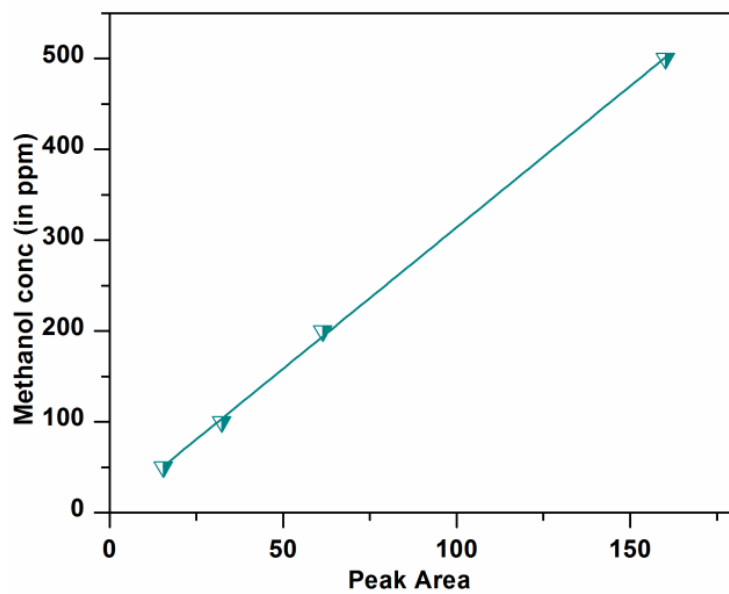

Fig. S3 Calibration Curve for Quantification of methanol.

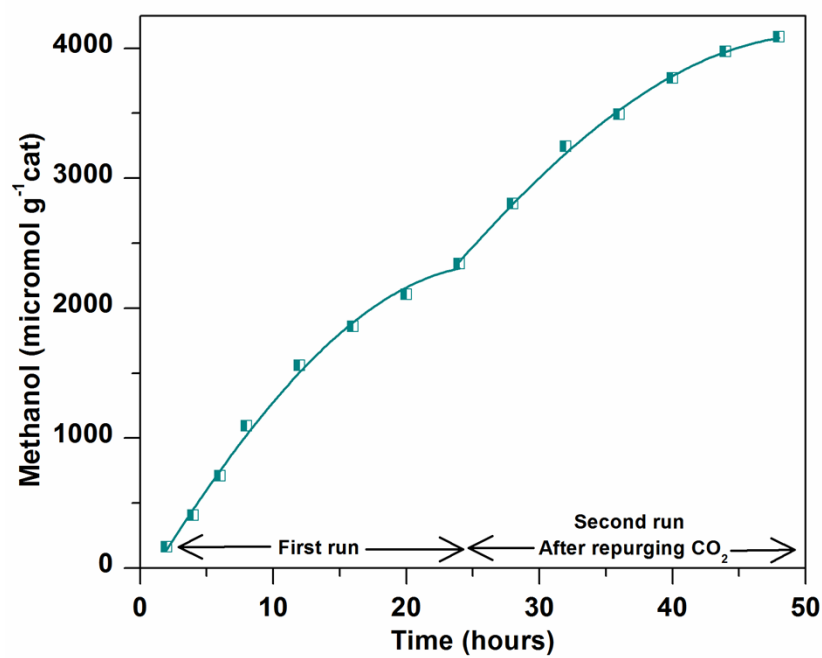

Fig. S4 Methanol yield after repurging CO<sub>2</sub>

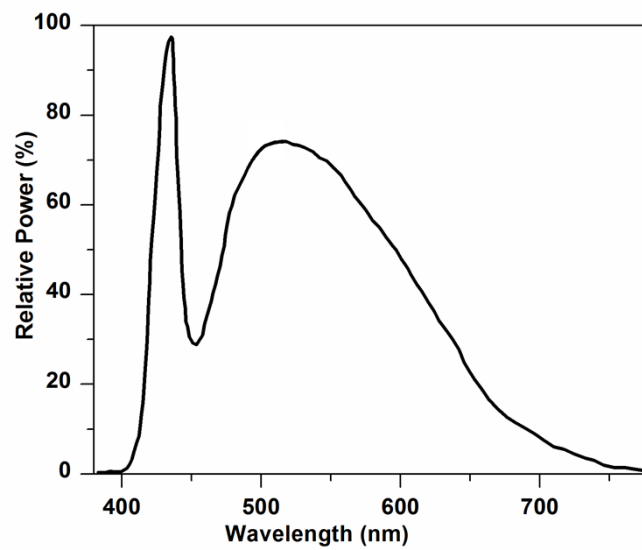

**Fig. S5** Spectral power distribution of lamp
